# Supplementary material for: Humoral response to SARS-CoV-2 vaccination in haemodialysis patients and a matched cohort
Source: HighWire-hosted journal article supplement (doi:10.1136/bmjopen-2022-065741), 2022-11-01
Supplement: bmjopen-2022-065741supp001_data_supplement.pdf [file bmjopen-2022-065741supp001_data_supplement.pdf]

**Supplementary Materials**

Table S1. Number of missing data.

| Variables                                                                       | Entire cohort                |                      | Matched cohort               |                     |
|---------------------------------------------------------------------------------|------------------------------|----------------------|------------------------------|---------------------|
|                                                                                 | Dialysis patients<br>(n =65) | Controls<br>(n =500) | Dialysis patients<br>(n =49) | Controls<br>(n =89) |
| Age                                                                             | 0                            | 0                    | 0                            | 0                   |
| Sex                                                                             | 0                            | 0                    | 0                            | 0                   |
| Vaccine-unknown                                                                 | 2                            | 2                    | 2                            | 1                   |
| Days (range) between dates<br>of the second vaccination<br>and blood collection | 0                            | 0                    | 0                            | 0                   |
| Medical history                                                                 |                              |                      |                              |                     |
| COVID-19                                                                        | 0                            | 1                    | 0                            | 0                   |
| Hypertension                                                                    | 0                            | 1                    | 0                            | 0                   |
| Hyperlipidemia                                                                  | 0                            | 1                    | 0                            | 0                   |
| Bronchial asthma                                                                | 0                            | 1                    | 0                            | 0                   |
| Diabetes                                                                        | 0                            | 1                    | 0                            | 0                   |
| Cardiovascular disease                                                          | 0                            | 1                    | 0                            | 0                   |
| Gout                                                                            | 0                            | 1                    | 0                            | 0                   |
| Anaphylaxis                                                                     | 0                            | 1                    | 0                            | 0                   |
| Respiratory disease                                                             | 0                            | 1                    | 0                            | 0                   |
| Rheumatoid arthritis                                                            | 0                            | 1                    | 0                            | 0                   |
| Mental illness                                                                  | 0                            | 1                    | 0                            | 0                   |
| Medications                                                                     |                              |                      |                              |                     |
| Antihistamine                                                                   | 1                            | 3                    | 0                            | 0                   |
| NSAIDs                                                                          | 1                            | 4                    | 0                            | 0                   |
| Steroids                                                                        | 1                            | 4                    | 0                            | 0                   |
| Acetaminophen                                                                   | 0                            | 4                    | 0                            | 0                   |
| Immunosuppressants                                                              | 0                            | 5                    | 0                            | 0                   |
| Antitumor agents                                                                | 0                            | 5                    | 0                            | 0                   |
| Biological therapeutics                                                         | 0                            | 5                    | 0                            | 0                   |

Number of missing data are shown.
